# Supplementary material for: The mungbean VrP locus encoding MYB90, an R2R3-type MYB protein, regulates anthocyanin biosynthesis
Source: Frontiers journal article supplement (doi:10.3389/fpls.2022.895634), 2022-07-22

**Supplementary Figure S2.** Expression response to light of *VrMYB90*. (A) Anthocyanins accumulation after light exposure. (B) Expression difference of *VrMYB90* between dark and light treatment. (C) Expression level change of *VrMYB90* at different times after light treatment.

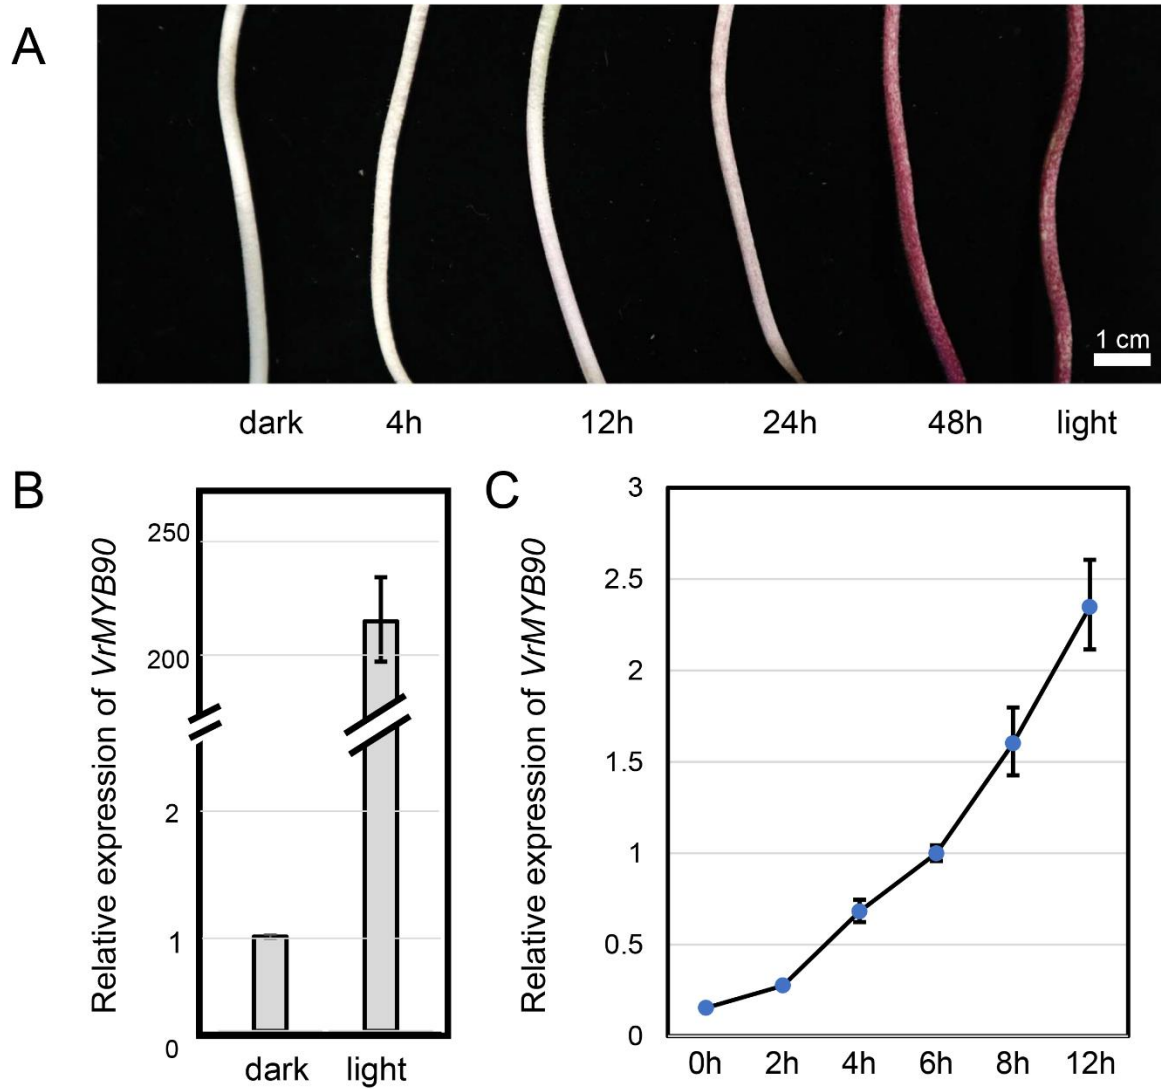

Supplement: Data_Sheet_2.PDF [file Data_Sheet_2.PDF]
