# Supplementary material for: The mungbean VrP locus encoding MYB90, an R2R3-type MYB protein, regulates anthocyanin biosynthesis
Source: Front Plant Sci. 2022 Jul 22;13:895634. doi: 10.3389/fpls.2022.895634 (PMC9355716; doi:10.3389/fpls.2022.895634)
Supplement: Supplementary file 3 [file Table_1.XLSX]

## Sheet: Sheet1
Supplementary Table S1. Details of 124 mungbean germplasm used for genome-wide association study
Accession name	Origin	Type	Hypocotyl color	Seed coat color	Haplotype
CN84-1	Thailand	Cultivar	Green	Green	Hap1
V2817	Nigeria	Cultivar	Green	Green	Hap1
KPS2	Thailand	Cultivar	Green	Green	Hap1
CN60	Thailand	Cultivar	Green	Green	Hap1
CN72	Thailand	Cultivar	Green	Green	Hap1
Binglv20	China	Cultivar	Green	Green	Hap1
Weilv15	Shandong, China	Cultivar	Purple	Green	Hap5
Teyou54	Shandong, China	Cultivar	Green	Green	Hap1
Wenxianlvdou	Henan, China	Landrace	Green	Green	Hap1
Weilv9	Shandong, China	Cultivar	Green	Green	Hap1
Weilv52580	Shandong, China	Cultivar	Green	Green	Hap1
Anchuguanglvdou	Hebei, China	Cultivar	Green	Green	Hap1
Jilv7	Hebei, China	Cultivar	Purple	Green	Hap5
V2709	Philippines	Landrace	Purple	Green	Hap5
NM	Afghanistan	Cultivar	Purple	Green	Hap5
KUML8	Thailand	Cultivar	Purple	Green	Hap2
Guilv1	Guangxi, China	Cultivar	Purple	Green	Hap5
ACC41	Australia	wild	Purple	Black	Hap4
Bailv11	Jilin, China	Cultivar	Purple	Green	Hap5
Bailv12	Jilin, China	Cultivar	Purple	Green	Hap5
Zhonglv4	Hebei, China	Cultivar	Purple	Green	Hap5
Jizhan10	Heilongjiang, China	Cultivar	Purple	Green	Hap5
122-376	Heilongjiang, China	Cultivar	Purple	Green	Hap5
Jinlv6	Shanxi, China	Cultivar	Purple	Green	Hap3
V4718	India	Landrace	Purple	Green	Hap5
H030	China	Landrace	Purple	Green	Hap5
Guangye	Hubei, China	Landrace	Purple	Green	Hap5
Bee ball	Hubei, China	Landrace	Purple	Green	Hap5
Zhailv	Hubei, China	Landrace	Purple	Green	Hap5
Elv4	Hubei, China	Cultivar	Purple	Black	Hap5
Anping	Hebei, China	Landrace	Purple	Green	Hap5
Zheng90-1	Hebei, China	Cultivar	Purple	Green	Hap5
Zhenglv9	Henan, China	Cultivar	Purple	Green	Hap5
Jilv16	Hebei, China	Cultivar	Purple	Green	Hap5
C2969	Unknown	Unknown	Purple	Green	Hap5
Weilv4005	Shandong, China	Cultivar	Green	Green	Hap1
Dengqibao	Hubei, China	Landrace	Green	Green	Hap1
Bao868-7-2-168	Hebei, China	Cultivar	Green	Green	Hap1
Ankang	Hebei, China	Landrace	Green	Green	Hap1
Dengjiatai	Hebei, China	Landrace	Purple	Green	Hap5
Bao956-6	Hebei, China	Cultivar	Purple	Green	Hap5
Wanlv5	Henan, China	Cultivar	Green	Green	Hap1
Wanlv6	Henan, China	Cultivar	Green	Green	Hap1
An9910	Henan, China	Cultivar	Purple	Green	Hap5
Zhnaglv2	Hebei, China	Landrace	Purple	Green	Hap5
Jilv14	Hebei, China	Cultivar	Purple	Green	Hap5
Weilv4	Shandong, China	Cultivar	Green	Green	Hap1
Jilv9	Hebei, China	Cultivar	Purple	Green	Hap5
Bao20050	Hebei, China	Cultivar	Purple	Green	Hap5
Yellowbean	Liaoning, China	Landrace	Purple	Yellow	Hap5
Minglv1	Anhui, China	Cultivar	Purple	Green	Hap5
Green pearl	Henan, China	Landrace	Purple	Green	Hap5
Weilv50934	Shandong, China	Cultivar	Green	Green	Hap1
Weilv7	Shandong, China	Cultivar	Purple	Green	Hap5
Tulv2	Inner Mongolia, China	Landrace	Purple	Green	Hap5
Tulv7	Inner Mongolia, China	Landrace	Purple	Green	Hap5
Tulv6	Inner Mongolia, China	Landrace	Purple	Green	Hap5
Yuanlvdou	Inner Mongolia, China	Landrace	Purple	Green	Hap5
Dabajiao	Inner Mongolia, China	Landrace	Purple	Green	Hap5
Anhei5	Henan, China	Cultivar	Purple	Black	Hap5
Bigleaf	Inner Mongolia, China	Landrace	Purple	Green	Hap5
Xiaowu	Inner Mongolia, China	Landrace	Purple	Green	Hap5
Nenglv2	Heilongjiang, China	Cultivar	Purple	Green	Hap5
Jilv13	Hebei, China	Cultivar	Purple	Green	Hap5
Zhenglv17	Henan, China	Cultivar	Purple	Green	Hap5
2016-45-1-1-2	Henan, China	Cultivar	Green	Green	Hap1
An05-4	Henan, China	Cultivar	Purple	Green	Hap5
Yilv1	Henan, China	Cultivar	Purple	Green	Hap5
BLS98051	Unknown	Cultivar	Purple	Green	Hap5
Zhenglv5	Henan, China	Cultivar	Purple	Green	Hap5
V3476AG	Philippines	Breeding line	Purple	Green	Hap5
Shuanglv1	Unknown	Cultivar	Green	Green	Hap1
Anhei2	Henan, China	Cultivar	Green	Black	Hap1
Wanhuang1	Anhui, China	Landrace	Green	Yellow	Hap1
Wanhei1	Anhui, China	Cultivar	Purple	Black	Hap5
Zhenglv19	Henan, China	Cultivar	Purple	Green	Hap5
Zhenglv20	Henan, China	Cultivar	Green	Green	Hap1
Laoyazhua	Henan, China	Landrace	Purple	Green	Hap5
JP240329	China	Landrace	Purple	Green	Hap5
V6031BY	Mexico	Unknown	Purple	Green	Hap5
JP81650	Sri Lanka	Landrace	Purple	Green	Hap5
Weilv13	Shandong, China	Cultivar	Purple	Green	Hap5
Crystal	Australia	Cultivar	Green	Green	Hap1
Ruyang	Henan, China	Landrace	Purple	Green	Hap5
Hongjin	Unknown	Landrace	Purple	Green	Hap5
JP78926	Uzbekistan	Landrace	Purple	Green	Hap5
Yaolv5	Shanxi, China	Cultivar	Purple	Green	Hap5
Zheng03-94 187	Henan, China	Cultivar	Purple	Green	Hap5
Bao200612-6-1 188	Hebei, China	Cultivar	Purple	Green	Hap5
Bao862-8-2 71	Hebei, China	Cultivar	Purple	Green	Hap5
Baolv200832-9 215	Hebei, China	Cultivar	Purple	Green	Hap5
Elv3	Hubei, China	Cultivar	Green	Green	Hap1
Jianlvdou	Hubei, China	Cultivar	Purple	Green	Hap5
Xinjin	Hebei, China	Landrace	Green	Green	Hap1
C2737	Henan, China	Landrace	Purple	Green	Hap5
Jilv11	Hebei, China	Cultivar	Purple	Green	Hap5
Wanlv4	Henan, China	Cultivar	Green	Green	Hap1
Dalihuang	Henan, China	Landrace	Green	Yellow	Hap1
Dengtai	Henan, China	Landrace	Purple	Green	Hap5
2016-48-2-2-3	Henan, China	Cultivar	Purple	Green	Hap5
Zhenghei1	Henan, China	Cultivar	Green	Green	Hap1
Zhonghuang1	Henan, China	Cultivar	Green	Yellow	Hap1
Zhenglv11	Henan, China	Cultivar	Purple	Green	Hap5
Wanlv1	Henan, China	Cultivar	Green	Green	Hap1
Elv5	Henan, China	Cultivar	Purple	Green	Hap5
Wanlv2	Henan, China	Cultivar	Green	Green	Hap1
Weilv1	Shandong, China	Cultivar	Purple	Green	Hap5
Dingjiamao	Henan, China	Landrace	Purple	Green	Hap5
Zheng03-94	Henan, China	Cultivar	Green	Green	Hap1
JP240343	India	Landrace	Purple	Green	Hap5
JP240373	Myanmar	Landrace	Green	Green	Hap1
Sulv1	Jiuangsu	Cultivar	Green	Green	Hap1
Jilv4	Jilin, China	Cultivar	Purple	Green	Hap5
Wanlv8	Henan, China	Cultivar	Purple	Green	Hap5
Zheng8-10-1	Henan, China	Cultivar	Purple	Green	Hap5
Baolv201012-7	Hebei, China	Cultivar	Purple	Green	Hap5
VC1560D	China (Taiwan)	Breeding line	Green	Green	Hap1
Yuelv1	Shaanxi, China	Cultivar	Purple	Green	Hap5
M1057	Jiangsu, China	Cultivar	Green	Green	Hap1
M1150	Jiangsu, China	Cultivar	Green	Green	Hap1
M1052	Jiangsu, China	Cultivar	Purple	Green	Hap5
M1124	Jiangsu, China	Cultivar	Green	Green	Hap1
Nampyeong	Korea	Unknown	Purple	Green	Hap5
Sunhwa	Korea	Unknown	Purple	Green	Hap5
