# Supplementary material for: The mungbean VrP locus encoding MYB90, an R2R3-type MYB protein, regulates anthocyanin biosynthesis
Source: Front Plant Sci. 2022 Jul 22;13:895634. doi: 10.3389/fpls.2022.895634 (PMC9355716; doi:10.3389/fpls.2022.895634)
Supplement: Supplementary file 4 [file Table_2.XLSX]

## Sheet: Sheet1
Supplementary Table S2. Sequences of primers used in this study.
Primer name	Forward sequence	Reverse sequence	Purpose
SSR 4-2	GGAACCAAGGAAAGCAGATG	ATGAGGCAAGCTTGGTCCA	mapping of VrP in population A
SSR 4-17	CTGGATCCAAAGCCTGTCGA	TCTACGTGCATGCACAAAGAC	mapping of VrP in population A
PS-97	TTTGGAGAGAGAAACCTAGGT	TTTCGCCACCATGAGACCAA	mapping of VrP in population A
PS-14	TGGCACCAAACAAAGGTTGAC	GGTTGTCGTCCTTGGACCAT	mapping of VrP in population A
PS-19	GCAGATTGCATGTGCTGTTT	TGCCATGGAACCTGCAATTG	mapping of VrP in population A
WS-28	TGGCATGCTACCGTTTTCTC	GCATATCTCTTGCAATTTTCCA	mapping of VrP in population A
WS-2	TGGATCCCTACAGCAGCATG	TGCAGAGAAAGGGATAGAAGGG	mapping of VrP in population A
WS-16	GAGCAAACTTGATCGGTAG	TGATACGAGATAGTGGCTTC	mapping of VrP in population A
WS-43	GCCTTGTTGTTAAATGCAGT	AACATGTTGCACGCTGAC	mapping of VrP in population A
PS-66	TTTGCTGCTAACTGGGAAGT	GGACGCATCACTCAAACACC	mapping of VrP in population A
PS-67	ACACCCACACCTCGCAAATT	TGGTAAAGCTTTTCAACCGCA	mapping of VrP in population A
Indel 4-8	AATGGAGAACCCCTAAAGGC	TGCCAGAAATGAACAGTCCA	mapping of VrP in population A
PS-1	ACAACTTAGCTGGACGCCAA	GCCAACCACACTTTGAATCCA	mapping of VrP in population B
PS-36	CCAAAACAACAAGCTTACAAGG	ACTGGAGTACTCATTGGATGGA	mapping of VrP in population B
PS-15	AAGATAGGATTCTGGACCAACC	TGAAATCACCATGCCCAGCT	mapping of VrP in population B
GK-2	CCAAAACGGACACCATTGCA	TGCTTCAAGATGCAAATTCAGT	mapping of VrP in population B
GK-1	AGTGCTCCCATGTGAACTATGT	GGTTTACGAGAGGCTGGCTT	mapping of VrP in population B
PS-69	GCCCAAACACTCGTATTTTGCA	ACAACTTCAACTCGGTCCCC	mapping of VrP in population B
PS-70	GGCACAGATAGTAACCAATGG	GGAACACCAAACACAATTTTCT	mapping of VrP in population B
QRT-ORF1	TTATTGGAAAGCCACAGGA	CCATTCGCCCTTAGCATA	qRT-PCR
QRT-ORF2	AATAACAACGCCAGCAATC	AATACCTCTACCCAGTCTTTCA	qRT-PCR
QRT-MYB90	GGGATTTCGGTGAAGACG	TTCTTTCGGATTCTTTGACG	qRT-PCR
QRT-ORF4	AACAGGTGGTCGGCAATA	TCGTTCTTGGGCTTGTGA	qRT-PCR
QRT-ORF5	CGCATACCACGGATACTGT	AGCCACAGACAAGCAAACTA	qRT-PCR
QRT-ORF6	TGTAAGGGTCATAATCTGCT	AACATCCCAGACTCCTTTA	qRT-PCR
QRT-ORF7	GAACCGCTGATTTCCTAA	GCAGGTTGATGGTGATTG	qRT-PCR
QRT-ORF8	TGGCAAATGTTATGAAGGC	ACAACAACGGTGCTGAAAA	qRT-PCR
AtCHS	GGCAAAGAAGCGGCAGTGAAG	CGGAAGGACGGAGACCAAGAAG	qRT-PCR
AtCHI	CTCTCTTACGGTTGCGTTTTCG	CACCGTTCTTCCCGATGATAGA	qRT-PCR
AtF3H	GACCAAGTCGGTGGATTACAAGC	TCCTTCAACAGGCTGAACCG	qRT-PCR
AtF3’H	TTCCTTACCTTCAGGCGGTTATC	CGAGAGTGGTGTTGGTGGATG	qRT-PCR
AtDFR	GTGGTTACTTTGTTCGTGCC	ACCGTCACATCCGTTTATGG	qRT-PCR
AtLDOX	TGTCAAGAAAGCCGGAGAAG	AAGACACTTCGCGTACTCAC	qRT-PCR
AtUFGT	CAGCACGGAGAACAGATTTTG	CTCACTTTCTCACCGATCTCAC	qRT-PCR
AtACTIN 8	GCTCCGTATTGCTCCTGAAG	GAGGATAGCATGTGGAAGTGAG	qRT-PCR
VrCHI-1	CTGTGAGGGATAGGTTGGC	ACACTGCTGTTGAGCCACC	qRT-PCR
VrCHI-2	CACTTTCCGTGGTGTCTTT	GGAGGGAGAAACAGGACTA	qRT-PCR
VrF3H-1	ACCATCACCTTGCTGCTTC	GATCGGTTCCTCCATCACA	qRT-PCR
VrF3H-2	CGTTGGGTTTGTCTTCTCAC	CACTGGCTCTATGGGTATGTT	qRT-PCR
VrF3H-3	TGACCATTCTCCTCCCTG	GAGTTGACAATCACCCTGTG	qRT-PCR
VrF3H-4	AAACATCTTGGTGCTTGCT	CCCTGTGCTCTATGCTCTT	qRT-PCR
VrF5H-1	GCTGTTTCCATTCCCTCAT	TGGTGCGAAGTGAGGTGA	qRT-PCR
VrF5H-2	TGGCGAGGTTCAACTTCTA	GCATTGTGGGAACACTGAC	qRT-PCR
VrDFR-1	CGAAGGAGACGCAGGAGTA	AAATGGTGGCAAGGTTGG	qRT-PCR
VrDFR-2	CTGTCATTCCACCTCTTGTC	ATCCTTGAACTTTGTGGGG	qRT-PCR
VrANS-1	TACATCAAGCCCTCTACCG	AAGTTTCCCTAACCTTGTCC	qRT-PCR
VrANS-2	GCTGTTTCCATTCCCTCAT	TGGTGCGAAGTGAGGTGA	qRT-PCR
VrANS-3	TCCACGCTCAGCCAAATC	AAGCCTGCTACCATACCCT	qRT-PCR
VrANS-4	AAACATCTTGGTGCTTGCT	ACCCTGTGCTCTATGCTCTT	qRT-PCR
VrANS-5	TGAGGGATGTGAGTGGAAA	GGCTCCCATCTTCCAACT	qRT-PCR
VrANS-6	CAAAGACCCTCCAACAACAC	CCCAAGCGACTTCCATAAC	qRT-PCR
VrLDOX-1	TCAACTACTACCCAATCTGTCC	AATGGTGTCTCCGATGTGC	qRT-PCR
VrLDOX-2	TGGAGCAATGACAAGTATGAG	TTCTCCACATCACGCTTCT	qRT-PCR
VrUGFT-1	CGCATCTATGGTGGTCTAAC	GTCTTGGGTGACTCAGGTAT	qRT-PCR
VrUGFT-2	CTGTCATACCTGAGCCACC	CCCTTCAACCCTTTCCTTA	qRT-PCR
VrUGFT-3	CCCATCACAGTTCCTCCTG	TTCTCCTCCTTGGCTCTTC	qRT-PCR
VrUGFT-4	AACCTTCACCCAAGTCTCA	GCAGAGGCAATAAGTGGG	qRT-PCR
VrUGFT-5	TCAGCACAAGCACCAGATTA	TTGAAAGCCACTCAGACCA	qRT-PCR
VrACTIN3	CAGTGTCTGGATTGGAGGCT	GTCCTCGACCACTTGATG	qRT-PCR
1305MYB90	CGGAGCTAGCTCTAGAATGATGGAAGGAAGATTAT	TGCTCACCATGGATCCATTAAGAAAAAAGTCGCTCC	Vector construction
