# Supplementary material for: The mungbean VrP locus encoding MYB90, an R2R3-type MYB protein, regulates anthocyanin biosynthesis
Source: Front Plant Sci. 2022 Jul 22;13:895634. doi: 10.3389/fpls.2022.895634 (PMC9355716; doi:10.3389/fpls.2022.895634)
Supplement: Supplementary file 5 [file Table_3.XLSX]

## Sheet: Sheet1
Supplementary Table S3. Annotated genes locating within the 78.9-kb region on mungbean chromosome 4 (Kang et al. 2014) covering the VrP locus controlling hypocotyl color
ORF	gene ID on NCBI	Position on chromosome 4	Direction	Annotation
ORF1	LOC106758035	17,630,505 to 17,633,267	Forward	MYB16 transcription factor
ORF2	LOC106759378	17,649,726 to 17,654,226	Forward	Cystathionine gamma-synthase 1
ORF3	LOC106758748	17,658,937 to 17,659,958	Reverse	MYB90 transcription factor
ORF4	LOC106758747	17,667,358 to 17,670,375	Forward	Transmembrane emp24 domain-containing protein
ORF5	LOC106758978	17,672,591 to 17,674,057	Forward	Pentatricopeptide repeat-containing protein
ORF6	LOC106759332	17,678,453 to 17,680,864	Reverse	Pentatricopeptide repeat-containing protein
ORF7	LOC106759333	17,682,006 to 17,685,676	Forward	Pectinesterase 31
ORF8	LOC106759075	17,686,070 to 17,688,096	Reverse	Vesicle transport v-SNARE 11
